# Supplementary material for: Analysis of Ciliate Community Diversity in Decaying Pinus nigra Logs
Source: MDPI journal article supplement (doi:10.3390/f13050642), 2022-04-21
Supplement: s1 [file s1]

Archive with 1 entries (1 files):
- forests-1650216-supplementary.pdf
