# Supplementary material for: Analysis of Ciliate Community Diversity in Decaying Pinus nigra Logs
Source: MDPI journal article supplement (doi:10.3390/f13050642), 2022-04-21
Supplement: s1 [file s1 › forests-1650216-supplementary.pdf]

## **Supplementary materials**

### **Analysis of Ciliate Community Diversity in Decaying *Pinus nigra* Logs**

Roberta Pastorelli<sup>1\*</sup>, Maria Alexandra Cucu<sup>1</sup>, Alessandra Lagomarsino<sup>1</sup>, Alessandro Paletto<sup>2</sup>,  
Alessandro Elio Agnelli, Isabella De Meo<sup>1</sup>

<sup>1</sup> *Research Centre for Agriculture and Environment, Consiglio per la ricerca in agricoltura e l'analisi dell'economia agraria, via di Lanciola 12/A, 50125, Firenze, Italy.*

<sup>2</sup> *Research Centre for Forestry and Wood, Consiglio per la ricerca in agricoltura e l'analisi dell'economia agraria, piazza Nicolini 6, 38100, Trento, Italy.*

\* For correspondence. E-mail [roberta.pastorelli@crea.gov.it](mailto:roberta.pastorelli@crea.gov.it); Tel. +39-055-2492247.

**Table S1.** Description of visual characteristics used to assign the decay class.

| Decay class | Description                                                                                             |
|-------------|---------------------------------------------------------------------------------------------------------|
| 1           | Recently dead - small branches, wood texture intact, visible little rotten areas under bark             |
| 2           | Weakly decayed - twigs partly present, wood texture intact, rotten areas < 3cm                          |
| 3           | Medium decay - no twigs, wood texture partly broken, rotten area > 3cm                                  |
| 4           | Very decay - no twigs, wood soft, texture with blocky pieces, large rotten areas                        |
| 5           | Almost decomposed - no twigs, wood soft, powdery texture, very large rotten areas with musk and lichens |

Source: modified by Paletto and Tosi (2009).

**Table S2.** BLAST analysis of 18S rDNA fragments selected from PCR-DGGE belonged to other Eukariota domain. The sequence coverage of the nearest match was also reported. The taxonomical identification was achieved by using different sequence similarity thresholds: a similarity  $\geq 97\%$ ,  $\geq 95\%$ ,  $\geq 90\%$ ,  $\geq 85\%$ ,  $\geq 80\%$  and  $\geq 75\%$  for assignment at the species-, genus-, family-, order-, class- and phylum-levels identification, respectively.

| Clone | Query Cover | Nearest match (GenBank accession no.; % similarity)       | Taxonomical classification                                           |
|-------|-------------|-----------------------------------------------------------|----------------------------------------------------------------------|
| C14   | 82%         | <i>Cladonia cerviconis</i> MACB90738 (JN940200; 90.87%)   | Fungi; Division Ascomycota; Unclassified <i>Cladoniaceae</i>         |
| C24   | 82%         | <i>Micarea adnata</i> (AF455134; 94.66%)                  | Fungi; Division Ascomycota; Unclassified <i>Lecanorineae</i>         |
| C31   | 82%         | <i>Micarea adnata</i> (AF455134; 94.99%)                  | Fungi; Division Ascomycota; Unclassified <i>Lecanorineae</i>         |
| C41   | 82%         | <i>Micarea adnata</i> (AF455134; 94.82%)                  | Fungi; Division Ascomycota; Unclassified <i>Lecanorineae</i>         |
| C78   | 82%         | <i>Micarea adnata</i> (AF455134; 94.49%)                  | Fungi; Division Ascomycota; Unclassified <i>Lecanorineae</i>         |
| B10   | 95%         | <i>Poria versipora</i> ATCC32573 (AF082672; 99.82%)       | Fungi; Division Basidiomycota; <i>Poria versipora</i>                |
| C12   | 99%         | <i>Eucephalobus striatus</i> EuceStr2 (AY284667; 97.02%)  | Phylum Nematoda; Order Rhabditida; <i>Eucephalobus striatus</i>      |
| C33   | 99%         | <i>Aphelenchoides saprophilus</i> 2140 (FJ040408; 98.54%) | Phylum Nematoda; Order Rhabditida; <i>Aphelenchoides saprophilus</i> |
| C43   | 99%         | <i>Aphelenchoides iranicus</i> S_R1 (KU565874; 98.70%)    | Phylum Nematoda; Order Rhabditida; <i>Aphelenchoides iranicus</i>    |
| C22   | 99%         | uncultured soil eukaryote r516 (MK946118; 88.50%)         |                                                                      |
| C61   | 99%         | uncultured soil eukaryote r516 (MK946118; 88.63%)         |                                                                      |
| B14   | 97%         | <i>Pinus nigra</i> accession number (MT796546; 87.37%)    |                                                                      |

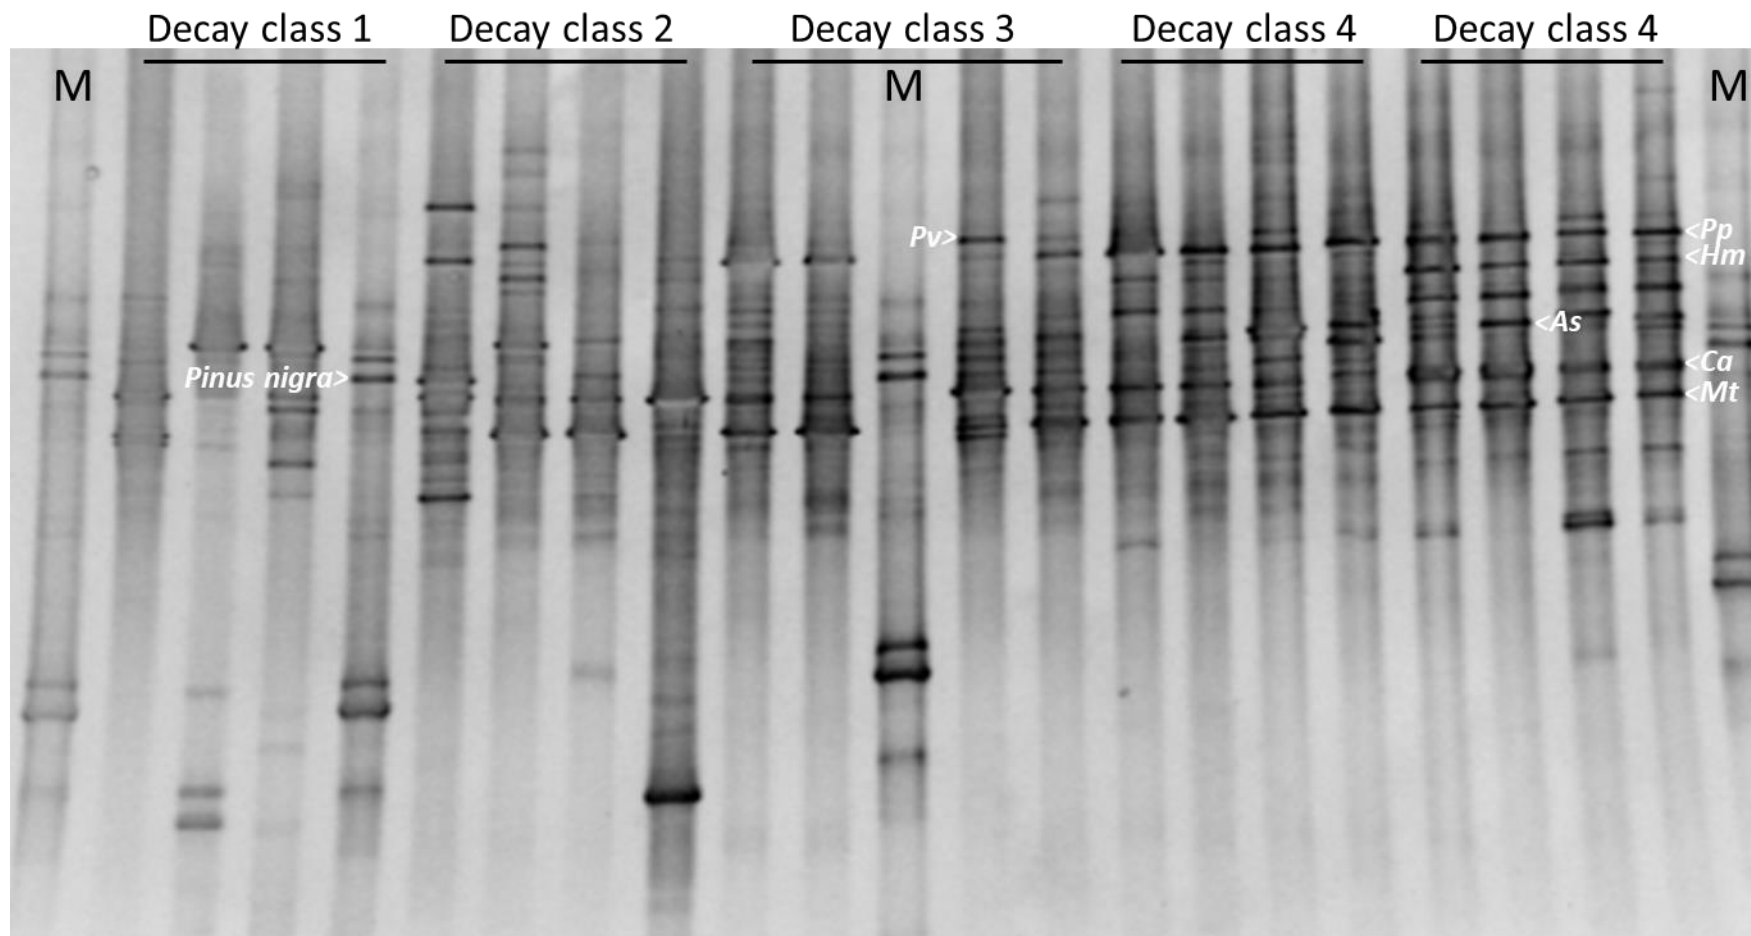

**Figure S1.** DGGE profiles of ciliate 18S rDNA gene fragments obtained from deadwood samples in Pratomagno area. Samples were grouped in base of decay class and the letter M on the gel image indicates the marker used marker used for normalization of bands. Excised sequenced band related to *Pinus nigra* and those that significant contribute to separate last decay classes were pointed out: *Holosticha multistylata*, Hm; *Platyophrya vorax*, Pv; *Mykophagophrys terricola*, Mt; *Anteholosticha sigmoidea*, As; *Colpoda aspera*, Ca; *Paraholosticha pannonica*, Pp.

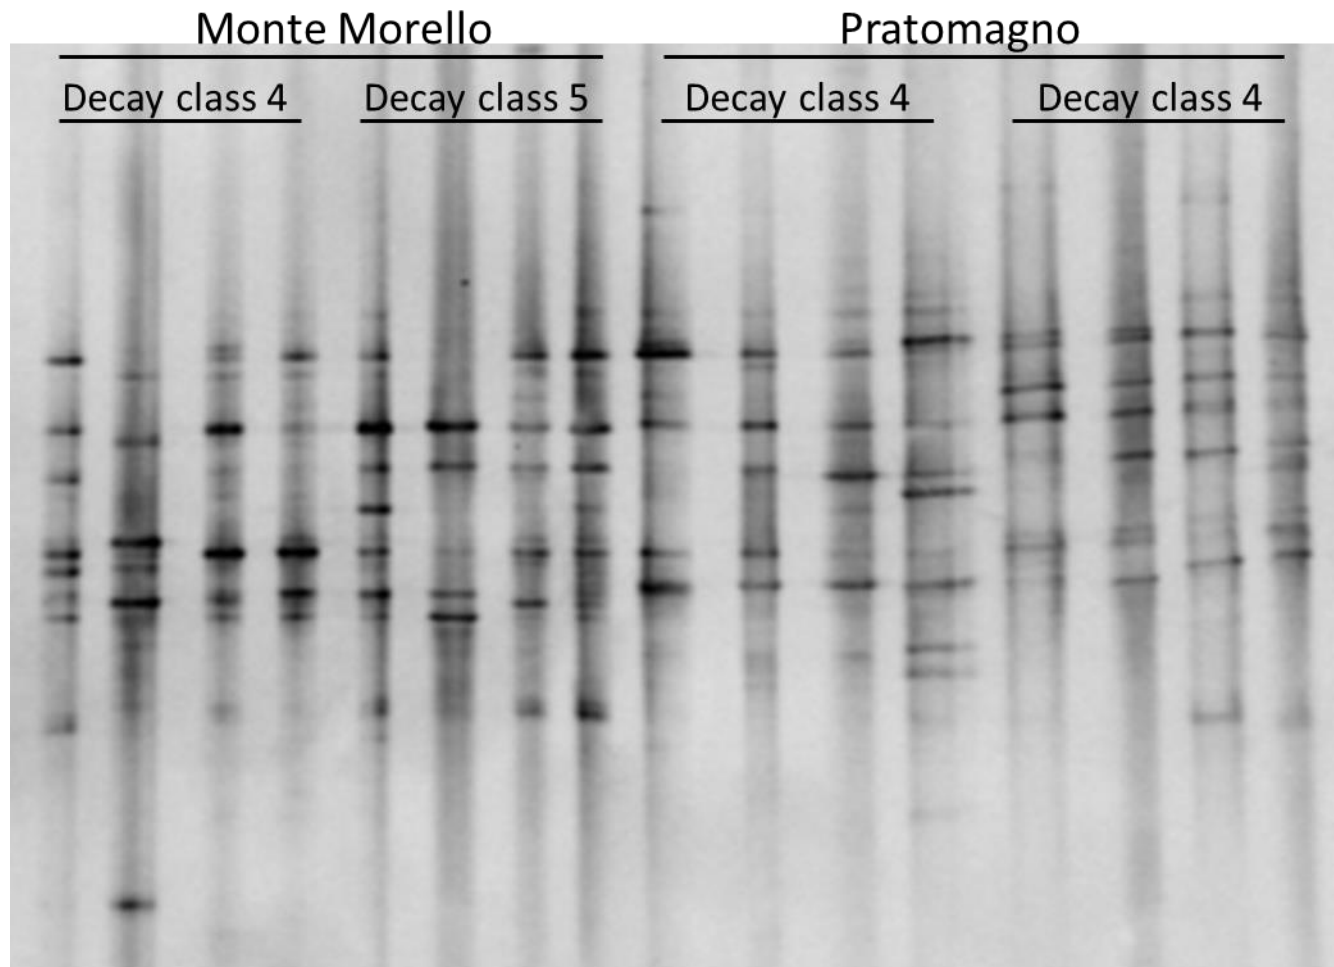

**Figure S2.** DGGE profiles of ciliate 18S rDNA gene fragments obtained from deadwood decay classes 4 and 5 collected in Monte Morello and Pratomagno areas. Samples were grouped in base of decay class and the letter M on the gel image indicates the marker used marker used for normalization of band.
